# Supplementary material for: The Evidence That 25(OH)D3 and VK2 MK-7 Vitamins Influence the Proliferative Potential and Gene Expression Profiles of Multiple Myeloma Cells and the Development of Resistance to Bortezomib
Source: MDPI journal article supplement (doi:10.3390/nu14235190), 2022-12-06
Supplement: s1 [file s1]

Table S1. Involvement of genes from the SNORDs group in the development of resistance to BTZ in U266 myeloma cells. Data compiled on the basis of DAVID analysis.

| BTZ treatment I |                                                                                                                                                                                                                           | BTZ treatment II                                                      |                                                                                                                                                                                                                                                                                                                                              | BTZ treatment III                                                                                                                    |                                                                                                                                                                                                                                                                                                                                                                                    |
|-----------------|---------------------------------------------------------------------------------------------------------------------------------------------------------------------------------------------------------------------------|-----------------------------------------------------------------------|----------------------------------------------------------------------------------------------------------------------------------------------------------------------------------------------------------------------------------------------------------------------------------------------------------------------------------------------|--------------------------------------------------------------------------------------------------------------------------------------|------------------------------------------------------------------------------------------------------------------------------------------------------------------------------------------------------------------------------------------------------------------------------------------------------------------------------------------------------------------------------------|
| up              | down                                                                                                                                                                                                                      | up                                                                    | down                                                                                                                                                                                                                                                                                                                                         | up                                                                                                                                   | down                                                                                                                                                                                                                                                                                                                                                                               |
| -               | SNORD19B,<br>SNORA68,<br>SNORD51,<br>SNORD42B,<br>SNORD37,<br>SNORD33,<br>SNORD32A,<br>SNORA10,<br>SNORD21,<br>SNORA52,<br>SNORA75,<br>SNORA55,<br>SNORA50C,<br>SNORD1C,<br>SNORD50B,<br>SNORD19,<br>SNORD69,<br>SNORD38B | SNORD36B,<br>SNORD18A,<br>SNORA26,<br>SNORA78,<br>SNORD23,<br>SNORD94 | SNORD116-20,<br>SNORA80B,<br>SNORD15B,<br>SNORD12C,<br>SNORA71A,<br>SNORD63,<br>SNORD60,<br>SNORD51,<br>SNORD43,<br>SNORD109A,<br>SNORD95,<br>SCARNA22,<br>SNORA1,<br>SNORA5B,<br>SNORA22,<br>SNORA51,<br>SNORA55,<br>SNORA71C,<br>SNORA81,<br>SNORD1C,<br>SNORD12,<br>SNORD45C,<br>SNORD99,<br>SNORD97,<br>SNORD3A,<br>SNORD14C,<br>SNORD27 | SNORD12B,<br>SNORD102,<br>SNORA71A,<br>SNORD63,<br>SNORD32A,<br>SNORA10,<br>SNORD16,<br>SNORD74,<br>SNORA21,<br>SNORA5C,<br>SNORA71C | SNORD116-4,<br>SNORD116-20,<br>SNORD58C,<br>SNORA80B,<br>SNORA66,<br>SNORD59A,<br>SNORD54,<br>SNORD47,<br>SNORD42B,<br>SNORD35A,<br>SNORD101,<br>SNORD100,<br>SNORD20,<br>SNORA41,<br>SNORA48,<br>SNORA13,<br>SCARNA22,<br>SNORA5B,<br>SNORA24,<br>SNORA51,<br>SNORA81,<br>SNORA25,<br>SNORD12,<br>SNORD5,<br>SNORD99,<br>SNORD97,<br>SNORD14C,<br>SNORD29,<br>SNORD30,<br>SNORD27 |
